# Supplementary material for: Autoinhibition of the kinesin-2 motor KIF17 via dual intramolecular mechanisms
Source: PubMed Central journal article supplement — J Cell Biol. 2010 Jun 14;189(6):1013–25. doi: 10.1083/jcb.201001057 (PMC2886353; doi:10.1083/jcb.201001057), 2010-06-14
Supplement: supp_jcb.201001057_JCB_201001057_sm.pdf [file supp_jcb.201001057_JCB_201001057_sm.pdf]

Hammond et al., <http://www.jcb.org/cgi/content/full/jcb.201001057/DC1>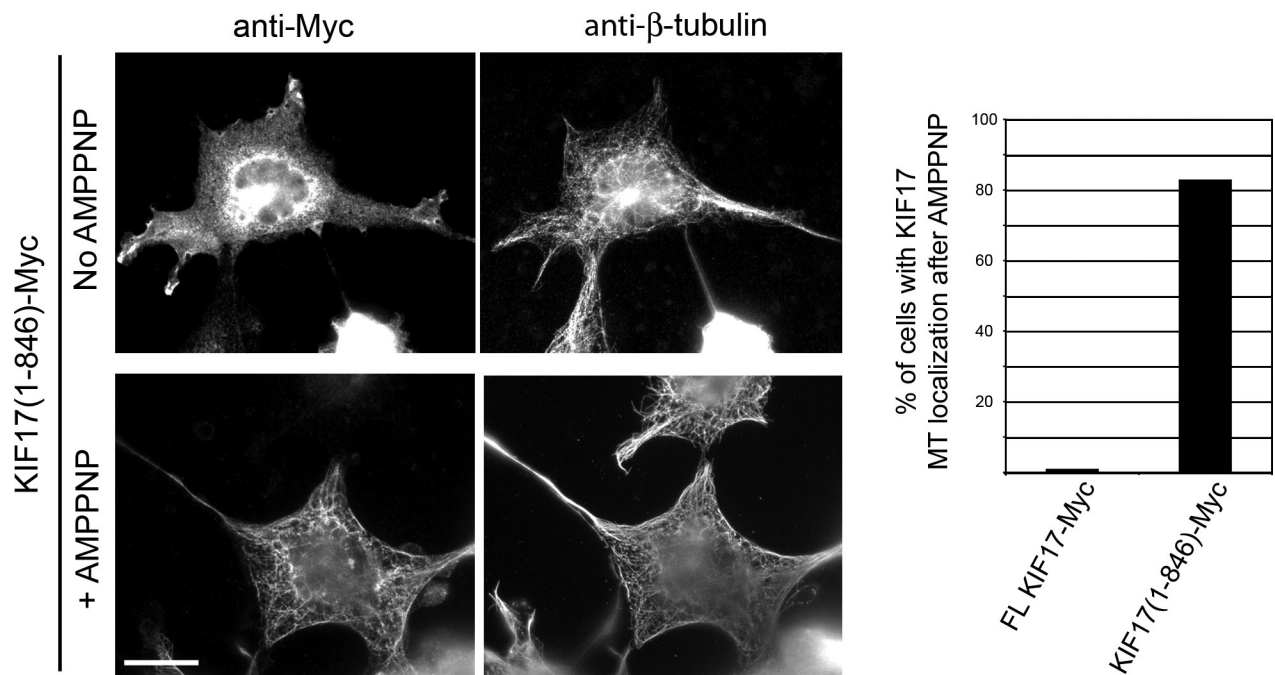

Figure S1. **The C-terminal tail domain is required for inhibition of microtubule binding.** Microtubule binding assay in fixed cells. COS cells expressing the truncated construct (1–846)-Myc were untreated or treated with SLO and AMPPNP, then fixed and immunostained with anti-Myc and anti-tubulin antibodies. At least 12 cells in two independent experiments were counted for each construct. Bar, 20  $\mu$ m.

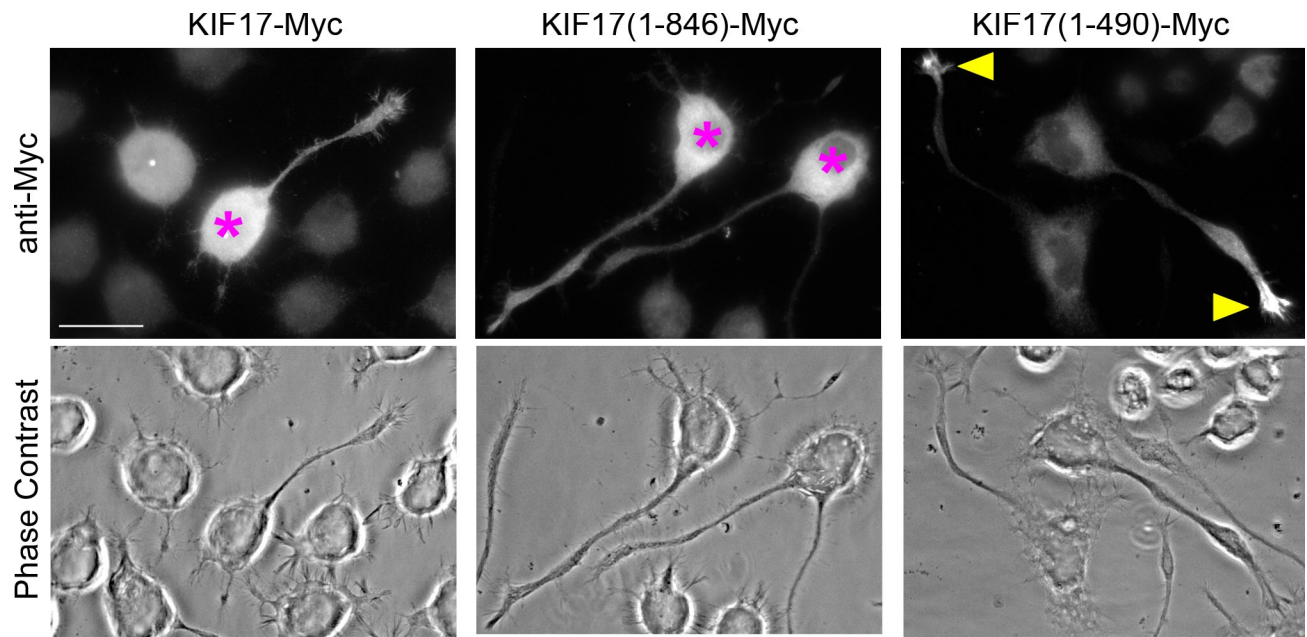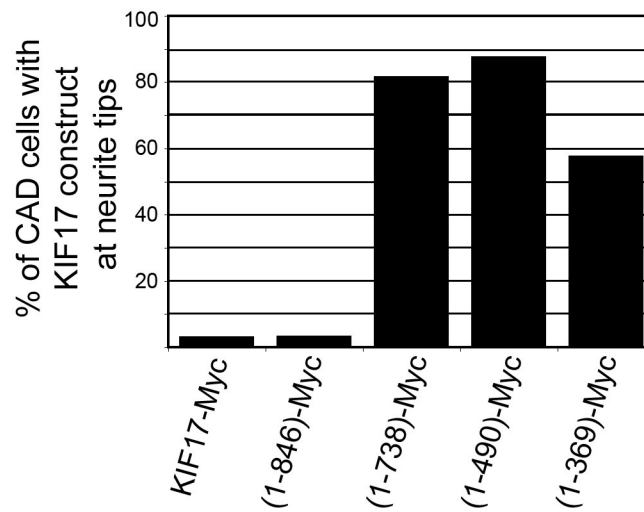

Figure S2. **The CC2 segment is required for inhibition of processive motility.** Processive motility in vivo. CAD cells expressing FL or truncated KIF17 constructs (C-terminal Myc tag) were fixed and stained with antibodies to the Myc tag. Shown are anti-Myc fluorescence (top) and phase-contrast (bottom) images of representative cells. Asterisks, cell bodies containing inactive KIF17 motors; arrows, neurite tips with accumulation of active KIF17 motors. The percentage of cells with the indicated KIF17 constructs accumulated at neurite tips is shown on the bottom. At least 10 cells in two independent experiments were counted for each construct. Bar, 20  $\mu$ m.
